# Supplementary material
Source: Elsevier journal article supplement (https://www.sciencedirect.com/science/article/pii/S1885585720300438)

## Multi-modality evaluation of transcatheter structural valve degeneration at long-term follow-up

### SUPPLEMENTARY DATA

**Table 1 of the supplementary data.** Factors associated with structural valve degeneration post-TAVR.

|                     | Univariate       |          | Multivariate     |          |
|---------------------|------------------|----------|------------------|----------|
|                     | HR (95%CI)       | <i>P</i> | HR (95%CI)       | <i>P</i> |
| <i>Variable</i>     |                  |          |                  |          |
| Male sex            | 0.56 (0.31-1.02) | .056     | 0.90 (0.37-2.20) | .823     |
| Hypertension        | 5.38 (0.74-38.9) | .096     | 5.29 (0.73-38.2) | .099     |
| Valve size 20-23 mm | 1.89 (1.10-3.27) | .021     | 1.76 (0.78-3.99) | .177     |

95%CI, 95% confidence interval; HR, hazard ratio;

**Table 2 of the supplementary data.** Transoesophageal echocardiography data, clinical management and outcome of SVD patients (n = 15).

| Patient No. | Cause of SVD | Leaflet mobility | Leaflet thickness | AR grade | AR type         | Clinical management and outcome                       |
|-------------|--------------|------------------|-------------------|----------|-----------------|-------------------------------------------------------|
| 1           | AR           | Normal           | Thickened         | 4        | Both            | No treatment. Died at age 84 y from HF                |
| 2           | AR           | Reduced          | Thickened         | 3        | Both            | No treatment. Died at age 83 y from HF                |
| 3           | AR           | Reduced          | Thickened         | 3        | Intraprosthetic | No treatment. Death at age 73 y from HF               |
| 4           | AR           | Reduced          | Thickened         | 3        | Both            | TAVR-in-TAVR 1 y after diagnosis                      |
| 5           | AR           | Reduced          | Thickened         | 4        | Both            | TAVR-in-TAVR 4 y after diagnosis                      |
| 6           | AR           | Reduced          | Thickened         | 4        | Intraprosthetic | TAVR-in-TAVR 2 y after diagnosis                      |
| 7           | AR           | Normal           | Normal            | 1        | Both            | No treatment. Died at age 76 y from TAVR endocarditis |
| 8           | AR           | Normal           | Normal            | 3        | Both            | TAVR-in-TAVR 2 mo after diagnosis                     |
| 9           | AR+stenosis  | Reduced          | Thickened         | 2        | Both            | No treatment. Died at age 75 y from HF                |
| 10          | AR+stenosis  | Reduced          | Thickened         | 3        | Intraprosthetic | TAVR-in-TAVR 2 y after diagnosis                      |
| 11          | Stenosis     | Reduced          | Thickened         | 1        | Perivalvular    | No treatment. Died at age 79 y from HF                |
| 12          | Stenosis     | Reduced          | Thickened         | 0        | -               | THV balloon valvuloplasty 8 d after diagnosis         |
| 13          | Stenosis     | Reduced          | Thickened         | 2        | Both            | TAVR-in-TAVR 1 y after diagnosis                      |
| 14          | Stenosis     | Reduced          | Thickened         | 3        | Intraprosthetic | TAVR-in-TAVR 4 mo after diagnosis                     |
| 15          | Stenosis     | Normal           | Normal            | 1        | Intraprosthetic | No treatment. Died at age 91 y from HF                |

AR, aortic regurgitation; HF, heart failure; SVD, structural valve degeneration; TAVR, transcatheter aortic valve replacement; THV, transcatheter heart valve.

Aortic regurgitation was graded from 0 to 4 (0 = none, 1 = trace, 2 = mild, 3 = moderate, 4 = severe).

**Table 3 of the supplementary data.** Baseline and procedural characteristics, according to the performance of MDCT examination at follow-up.

|                                    | No MDCT<br>(n = 127) | MDCT<br>(n = 85) | P    |
|------------------------------------|----------------------|------------------|------|
| <i>Clinical characteristics</i>    |                      |                  |      |
| Age, y                             | 79.8 ± 7.1           | 78.6 ± 8.3       | .268 |
| BMI, kg/m <sup>2</sup>             | 27.3 ±               | 26.2 ± 4.7       | .138 |
| Male sex                           | 56 (44.1)            | 28 (32.9)        | .116 |
| Diabetes mellitus                  | 44 (34.7)            | 27 (31.8)        | .767 |
| Hypertension                       | 115 (90.6)           | 77 (90.6)        | .992 |
| Dyslipidemia                       | 99 (78.6)            | 73 (85.9)        | .208 |
| COPD                               | 36 (28.4)            | 20 (23.5)        | .525 |
| NYHA class III-IV                  | 97 (76.4)            | 65 (76.5)        | .988 |
| eGFR < 60 mL/min                   | 75 (59.1)            | 57 (67.1)        | .251 |
| Previous CAD                       | 87 (68.5)            | 55 (64.7)        | .655 |
| Previous stroke                    | 29 (22.8)            | 16 (18.8)        | .608 |
| Previous atrial fibrillation       | 37 (29.1)            | 24 (28.2)        | .887 |
| STS-PROM score, %                  | 6.6 ± 3.8            | 6.6 ± 3.9        | .936 |
| <i>Baseline echocardiogram</i>     |                      |                  |      |
| LVEF, %                            | 52.6 ± 14.6          | 55.4 ± 14.4      | .162 |
| LVEF < 50%                         | 40 (31.5)            | 21 (24.7)        | .353 |
| Mean gradient, mmHg                | 40.6 ± 16.4          | 43.1 ± 16.8      | .274 |
| Aortic valve area, cm <sup>2</sup> | 0.66 ± 0.19          | 0.60 ± 0.18      | .029 |
| Moderate/severe AR                 | 5 (4.1)              | 9 (10.6)         | .092 |
| <i>Procedural variables</i>        |                      |                  |      |
| Transfemoral approach              | 55 (43.3)            | 27 (31.8)        | .114 |
| Valve size 20-23 mm                | 59 (46.5)            | 53 (62.4)        | .025 |
| Balloon predilation                | 122 (96.1)           | 82 (96.5)        | .879 |
| Balloon postdilation               | 27 (21.3)            | 24 (28.2)        | .255 |
| Need for second valve              | 1 (0.8)              | 3 (3.5)          | .304 |
| <i>Discharge echocardiogram</i>    |                      |                  |      |
| LVEF, %                            | 52.9 ± 12.8          | 55.2 ± 13.1      | .212 |
| LVEF < 50%                         | 34 (26.8)            | 18 (21.2)        | .417 |
| Mean gradient, mmHg                | 10.5 ± 4.2           | 11.5 ± 4.9       | .093 |
| Aortic valve area, cm <sup>2</sup> | 1.43 ± 0.34          | 1.29 ± 0.35      | .007 |
| Moderate/severe AR                 | 6 (4.8)              | 1 (1.2)          | .246 |
| Severe PPM                         | 23 (19.2)            | 24 (30.0)        | .089 |

BMI, body mass index; CAD, coronary artery disease; COPD, chronic obstructive pulmonary disease; eGFR, estimated glomerular filtration rate; HR, hazard ratio; LVEF, left ventricular ejection fraction; MDCT, multidetector computed tomography; NYHA, New York Heart Association; PPM, prosthesis-patient mismatch; STS-PROM, Society of Thoracic Surgeons-Predicted Risk of Mortality.

Values are expressed as No. (%), or mean ± standard deviation.

**Figure 1 of the supplementary data.** Incidence of clinically relevant structural valve degeneration (SVD) and subclinical SVD at mid-term (1-5 years) and long-term (6-10 years) of follow-up.

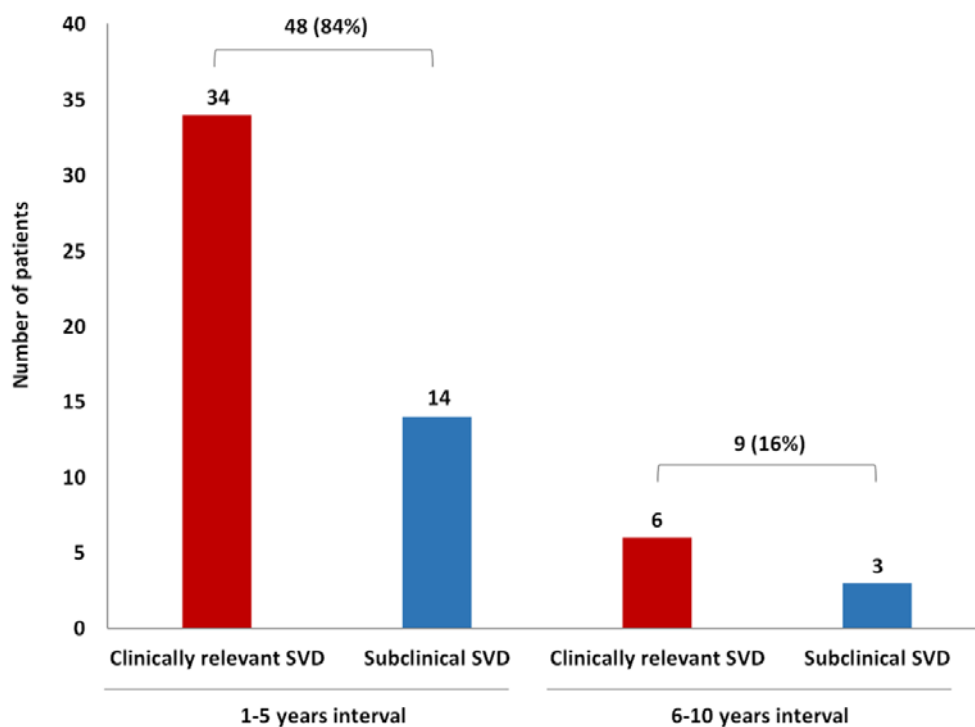

**Figure 2 of the supplementary data.** Changes in transcatheter valve hemodynamics of structural valve degeneration patients with transthoracic echocardiography assessment at hospital discharge, mid-term (1-5 years) and long-term (6-10 years) follow-up (n = 16). A: mean aortic gradient and effective orifice area;  $P < .001$  and  $P < .01$  for changes in mean gradient and effective orifice area from discharge to 6-10 year follow-up, respectively. B: intraprosthetic valve regurgitation.  $P = .045$  for the increase in the proportion of higher grades of intraprosthetic regurgitation. AR, aortic regurgitation.

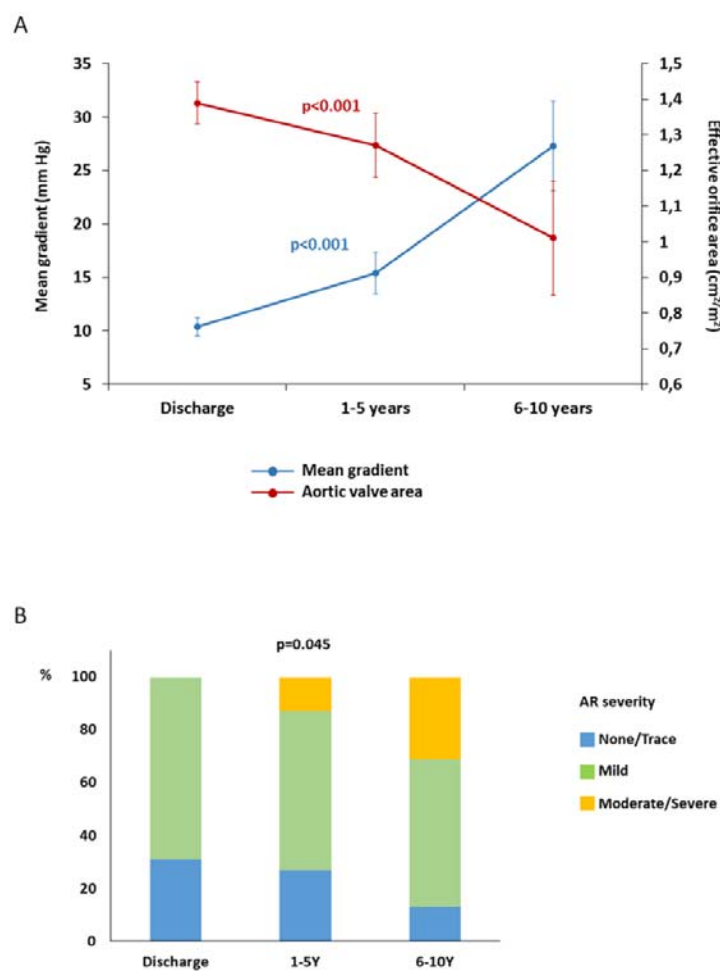

Supplement: mmc1 [file S1885585720300438:mmc1.pdf]
